# Supplementary material
Source: ML conference proceedings conference paper supplement (https://proceedings.neurips.cc/paper_files/paper/2020/hash/20b02dc95171540bc52912baf3aa709d-Abstract.html)
Supplement: Supplementary file [file 20b02dc95171540bc52912baf3aa709d-Supplemental.pdf]

---

# Supplementary material to ‘Locally private non-asymptotic testing of discrete distributions is faster using interactive mechanisms’

---

**Berrett Thomas**  
 CREST, ENSAE, IP Paris  
 5, avenue Henry le Chatelier  
 91120 Palaiseau Cedex, FRANCE  
 thomas.berrett@ensae.fr

**Butucea Cristina**  
 CREST, ENSAE, IP Paris  
 5, avenue Henry le Chatelier  
 91120 Palaiseau Cedex, FRANCE  
 cristina.butucea@ensae.fr

## Appendix

### A.1 Proofs of main theorems

*Proof of Theorem 1.* We first calculate means and variances of our two test statistics, starting with the  $U$ -statistic  $S_B$ . Define the function  $h : \mathbb{R}^B \times \mathbb{R}^B \rightarrow \mathbb{R}$  by

$$h(z_1, z_2) = \sum_{j \in B} \{z_{1j} - p_0(j)\} \{z_{2j} - p_0(j)\}$$

so that  $S_B = \frac{1}{n(n-1)} \sum_{i_1 \neq i_2} h(Z_{i_1}, Z_{i_2})$ . It is clear that

$$\mathbb{E} S_B = \sum_{j \in B} \{p(j) - p_0(j)\}^2.$$

Now, define

$$\zeta_1 := \text{Var}(\mathbb{E}\{h(Z_1, Z_2) | Z_1\}) \quad \text{and} \quad \zeta_2 := \text{Var}(h(Z_1, Z_2)).$$

Using Serfling [1980, Lemma A, p.183] and the fact that  $\text{Cov}(Z_{1j}, Z_{1j'}) = \mathbb{1}_{\{j=j'\}} \{p(j) + 8/\alpha^2\} - p(j)p(j')$ , we have that

$$\begin{aligned} \binom{n}{2} \text{Var} S_B &= \sum_{c=1}^2 \binom{2}{c} \binom{n-2}{2-c} \zeta_c = (2n-3)\zeta_1 + (\zeta_2 - \zeta_1) \\ &= (2n-3) \text{Var} \left( \sum_{j \in B} \{p(j) - p_0(j)\} \{Z_{2j} - p_0(j)\} \right) \\ &\quad + \mathbb{E} \left\{ \text{Var} \left( \sum_{j \in B} \{Z_{1j} - p_0(j)\} \{Z_{2j} - p_0(j)\} \mid Z_1 \right) \right\} \\ &= 2(n-1) \sum_{j, j' \in B} \{p(j) - p_0(j)\} \{p(j') - p_0(j')\} \text{Cov}(Z_{1j}, Z_{1j'}) + \sum_{j, j' \in B} \text{Cov}(Z_{1j}, Z_{1j'})^2 \\ &= 2(n-1) \sum_{j \in B} \{p(j) + 8/\alpha^2\} \{p(j) - p_0(j)\}^2 - 2(n-1) \left( \sum_{j \in B} p(j) \{p(j) - p_0(j)\} \right)^2 \\ &\quad + \sum_{j \in B} p(j)^2 \{1 - 2p(j)\} + \left( \sum_{j \in B} p(j) \right)^2 + \frac{64}{\alpha^4} |B| + \frac{16}{\alpha^2} \sum_{j \in B} p(j) \{1 - p(j)\} \\ &\leq \frac{18(n-1)}{\alpha^2} \sum_{j \in B} \{p(j) - p_0(j)\}^2 + \frac{82|B|}{\alpha^4}. \end{aligned}$$

As a result,

$$\text{Var } S_B \leq \frac{36}{n\alpha^2} \sum_{j \in B} \{p(j) - p_0(j)\}^2 + \frac{164|B|}{n(n-1)\alpha^4}.$$

We now turn to the test statistic  $T_B$ . First, it is clear that

$$\mathbb{E}T_B = p(B^c) - p_0(B^c).$$

Moreover,

$$\text{Var } T_B = \frac{1}{n} \left( \text{Var } \mathbb{1}_{\{X_{n+1} \in B^c\}} + \frac{4}{\alpha^2} \text{Var } W_{n+1} \right) = \frac{1}{n} \left[ p(B)\{1 - p(B)\} + \frac{8}{\alpha^2} \right] \leq \frac{9}{n\alpha^2}.$$

Now, under  $H_0$  we have that

$$\begin{aligned} \mathbb{P}(\phi_B = 1) &\leq \mathbb{P}(S_B \geq C_{1,B}) + \mathbb{P}(T_B \geq C_{2,B}) \\ &\leq \frac{n(n-1)\alpha^4\gamma}{656|B|} \times \frac{164|B|}{n(n-1)\alpha^4} + \frac{n\alpha^2\gamma}{36} \times \frac{9}{n\alpha^2} = \frac{\gamma}{2}. \end{aligned}$$

Now suppose that we have

$$\delta \geq 8 \max \left[ 12 \left\{ \frac{|B|^3}{n(n-1)\alpha^4\gamma^2} \right\}^{1/4}, p_0(B^c) \right], \quad (3)$$

which implies

$$\delta \geq 2 \max \left[ 24 \left\{ \frac{|B|^3}{n(n-1)\alpha^4\gamma^2} \right\}^{1/4}, 2p_0(B^c) + \frac{6 + 3\sqrt{2}}{(n\alpha^2\gamma)^{1/2}} \right].$$

Then, under  $H_1(\delta, \mathbb{L}_1)$ , at least one of

$$\sum_{j \in B} |p(j) - p_0(j)| \geq 24 \left\{ \frac{|B|^3}{n(n-1)\alpha^4\gamma^2} \right\}^{1/4} \quad (4)$$

or

$$\sum_{j \in B^c} |p(j) - p_0(j)| \geq 2p_0(B^c) + \frac{6 + 3\sqrt{2}}{(n\alpha^2\gamma)^{1/2}} \quad (5)$$

must hold. If (4) holds then we have that

$$\begin{aligned} \mathbb{P}(S_B < C_{1,B}) &\leq \frac{\text{Var } S_B}{[\mathbb{E}S_B - C_{1,B}]^2} \leq \frac{\frac{36}{n\alpha^2} \sum_{j \in B} \{p(j) - p_0(j)\}^2 + \frac{164|B|}{n(n-1)\alpha^4}}{[\sum_{j \in B} \{p(j) - p_0(j)\}^2 - \{\frac{656|B|}{n(n-1)\alpha^4\gamma}\}^{1/2}]^2} \\ &\leq \frac{\frac{36}{n\alpha^2} \sum_{j \in B} \{p(j) - p_0(j)\}^2}{[\sum_{j \in B} \{p(j) - p_0(j)\}^2 - \{\frac{656|B|}{n(n-1)\alpha^4\gamma}\}^{1/2}]^2} + \frac{\frac{164|B|}{n(n-1)\alpha^4}}{[576\{\frac{|B|}{n(n-1)\alpha^4\gamma}\}^{1/2} - \{\frac{656|B|}{n(n-1)\alpha^4\gamma}\}^{1/2}]^2} \\ &\leq \frac{144}{n\alpha^2 \sum_{j \in B} \{p(j) - p_0(j)\}^2} + \frac{756\gamma}{576^2} \leq \frac{144\gamma}{576} + \frac{756\gamma}{576^2} < \frac{\gamma}{2}. \end{aligned}$$

On the other hand, if (5) holds then we have that  $\mathbb{E}T_B = p(B^c) - p_0(B^c) \geq \frac{6+3\sqrt{2}}{(n\alpha^2\gamma)^{1/2}}$  and hence

$$\mathbb{P}(T_B < C_{2,B}) \leq \frac{\text{Var } T_B}{\{\mathbb{E}T_B - \frac{6}{(n\alpha^2\gamma)^{1/2}}\}^2} \leq \frac{n\alpha^2\gamma}{18} \times \frac{9}{n\alpha^2} = \frac{\gamma}{2}.$$

In conclusion, whenever  $H_1(\delta, \mathbb{L}_1)$  holds and  $\delta$  satisfies the lower bound in (3), we have that  $\mathbb{P}(\phi_B = 0) \leq \gamma/2$ , and the result follows.

Under  $H_1(\delta, \mathbb{L}_2)$  and using  $\sqrt{a+b} \leq \sqrt{a} + \sqrt{b}$ :

$$\left( \sum_{j \in B} |p(j) - p_0(j)|^2 \right)^{1/2} + \sum_{j \in B^c} |p(j) - p_0(j)| \geq \|p - p_0\|_2 \geq \delta.$$

Now, we suppose that we have instead of (3):

$$\begin{aligned}\delta &\geq 8 \max \left[ 12 \left\{ \frac{|B|}{n(n-1)\alpha^4\gamma^2} \right\}^{1/4}, p_0(B^c) \right] \\ &\geq 2 \max \left[ 24 \left\{ \frac{|B|}{n(n-1)\alpha^4\gamma^2} \right\}^{1/4}, 2p_0(B^c) + \frac{6+3\sqrt{2}}{(n\alpha^2\gamma)^{1/2}} \right].\end{aligned}$$

That implies, at least one of

$$\left( \sum_{j \in B} |p(j) - p_0(j)|^2 \right)^{1/2} \geq 24 \left\{ \frac{|B|}{n(n-1)\alpha^4\gamma^2} \right\}^{1/4}$$

or

$$\sum_{j \in B^c} |p(j) - p_0(j)| \geq 2p_0(B^c) + \frac{6+3\sqrt{2}}{(n\alpha^2\gamma)^{1/2}}$$

must hold. We conclude similarly the upper bounds for the  $\mathbb{L}_2$  test.  $\square$

The proof of Theorem 3 will make use of the following inequality.

**Lemma 1.** *Let  $Z \sim N(0, 1)$  and  $\mu, \lambda > 0$ . Then, writing  $[x]_{-\lambda}^\lambda = \max\{-\lambda, \min(x, \lambda)\}$ , we have that*

$$\mathbb{E}\{[\mu + Z]_{-\lambda}^\lambda\} \geq \frac{1}{2} \min(\mu, \lambda) \min(1, \lambda).$$

*Proof of Lemma 1.* Define

$$h(\mu, \lambda) := \frac{\mathbb{E}\{[\mu + Z]_{-\lambda}^\lambda\}}{\min(\mu, \lambda)} = \frac{\mu + (\lambda - \mu)\bar{\Phi}(\lambda - \mu) - (\lambda + \mu)\bar{\Phi}(\lambda + \mu) - \phi(\lambda - \mu) + \phi(\lambda + \mu)}{\min(\mu, \lambda)}.$$

We now show that, for a fixed  $\lambda > 0$ , we minimise  $h$  by taking  $\mu = \lambda$ . Indeed, for  $\mu > \lambda$  we have

$$\frac{\partial}{\partial \mu} h(\mu, \lambda) = \frac{1}{\lambda} \{1 - \bar{\Phi}(\lambda - \mu) - \bar{\Phi}(\lambda + \mu)\} > 0.$$

On the other hand, when  $\mu < \lambda$  we have

$$\frac{\partial}{\partial \mu} h(\mu, \lambda) = -\frac{1}{\mu^2} \{\lambda \bar{\Phi}(\lambda - \mu) - \lambda \bar{\Phi}(\lambda + \mu) - \phi(\lambda - \mu) + \phi(\lambda + \mu)\}.$$

Moreover,

$$\begin{aligned}\frac{\partial}{\partial \mu} \{ \lambda \bar{\Phi}(\lambda - \mu) - \lambda \bar{\Phi}(\lambda + \mu) - \phi(\lambda - \mu) + \phi(\lambda + \mu) \} \\ = \mu \{ \phi(\lambda - \mu) - \phi(\lambda + \mu) \} > 0\end{aligned}$$

and, as  $\mu \searrow 0$ , we have

$$\lambda \bar{\Phi}(\lambda - \mu) - \lambda \bar{\Phi}(\lambda + \mu) - \phi(\lambda - \mu) + \phi(\lambda + \mu) = \frac{2}{3} \lambda \mu^3 \phi(\lambda) + o(\mu^4) > 0.$$

It therefore follows that when  $\mu < \lambda$  we have  $\frac{\partial h}{\partial \mu} < 0$ . We have now shown that

$$h(\mu, \lambda) \geq h(\lambda, \lambda) = 1 - 2\bar{\Phi}(2\lambda) - \frac{1}{\lambda\sqrt{2\pi}} + \frac{1}{\lambda}\phi(2\lambda).$$

We can check (e.g. numerically) that  $h(\lambda, \lambda) \geq \min(1, \lambda)/2$ , and the result follows.  $\square$

*Proof of Theorem 3.* Recalling that  $\tau = (n\alpha^2)^{-1/2}$ , we first consider the expectation of our test statistic  $D_B$ . Writing  $\epsilon_j = \hat{p}_j - p(j)$ ,  $\Delta_j = p(j) - p_0(j)$  and  $\sigma_j^2 = \text{Var } \epsilon_j \leq 9/(n\alpha^2) = 9\tau^2$ , and letting  $Z \sim N(0, 1)$ , we have

$$\begin{aligned}&|\mathbb{E}\{[\hat{p}_j - p_0(j)]_{-\tau}^\tau\} - \mathbb{E}\{[\Delta_j - \sigma_j Z]_{-\tau}^\tau\}| \\ &= \left| \int_{-\Delta_j}^{\tau - \Delta_j} \{\mathbb{P}(\epsilon_j \geq x) - \mathbb{P}(\sigma_j Z \geq x)\} dx - \int_{\Delta_j}^{\tau + \Delta_j} \{\mathbb{P}(\epsilon_j \leq -x) - \mathbb{P}(\sigma_j Z \leq -x)\} dx \right| \\ &\leq 2\tau \sup_{x \in \mathbb{R}} |\mathbb{P}(\epsilon_j \leq x) - \mathbb{P}(\sigma_j Z \leq x)| \\ &\leq \frac{C\tau}{\sqrt{n}} \frac{\mathbb{E}\{|\mathbb{1}_{\{X_1=j\}} - p(j) + (2/\alpha)W_{11}|^3\}}{\{p(j)(1-p(j)) + 8/\alpha^2\}^{3/2}} \lesssim \frac{\tau}{\sqrt{n}},\end{aligned}$$

where the final line follows from an application of the Berry–Esseen theorem. Applying this bound and Lemma 1, we therefore have for some universal constant  $C > 0$  that

$$\begin{aligned}
\mathbb{E}D_B &= \sum_{j=1}^d \Delta_j \mathbb{E}\{[\widehat{p}_j - p_0(j)]_{-\tau}^\tau\} \geq \sum_{j=1}^d \Delta_j \mathbb{E}\{[\Delta_j + \sigma_j Z]_{-\tau}^\tau\} - \frac{C\tau}{\sqrt{n}} \|\Delta\|_1 \\
&\geq \sum_{j=1}^d |\Delta_j| \sigma_j \mathbb{E}\{[|\Delta_j|/\sigma_j + Z]_{-\tau/\sigma_j}^{\tau/\sigma_j}\} - \frac{C\tau}{\sqrt{n}} \\
&\geq \frac{1}{2} \sum_{j=1}^d |\Delta_j| \min(|\Delta_j|, \tau) \min(1, \tau/\sigma_j) - \frac{C\tau}{\sqrt{n}} \\
&\geq \frac{1}{6} \sum_{j=1}^d |\Delta_j| \min(|\Delta_j|, \tau) - \frac{C\tau}{\sqrt{n}} = \frac{1}{6} D_\tau(p) - \frac{C\tau}{\sqrt{n}}, \tag{6}
\end{aligned}$$

where we write  $D_\tau(p) := \sum_{j=1}^d |p(j) - p_0(j)| \min(\tau, |p(j) - p_0(j)|)$ . Moreover, under  $H_0$  we have that  $\mathbb{E}D_B = 0$ .

We now turn to the variance of  $D_B$ . Since the function  $x \mapsto [x]_{-\tau}^\tau$  is Lipschitz, we have that

$$\begin{aligned}
\text{Var}([\widehat{p}_j - p_0(j)]_{-\tau}^\tau) &\leq \mathbb{E}\left\{\left([\widehat{p}_j - p_0(j)]_{-\tau}^\tau - [p(j) - p_0(j)]_{-\tau}^\tau\right)^2\right\} \\
&\leq \text{Var}(\widehat{p}_j) \leq \frac{1}{n} + \frac{8}{n\alpha^2} \leq \frac{9}{n\alpha^2}. \tag{7}
\end{aligned}$$

On the other hand, when  $|p(j) - p_0(j)|$  is large, we can prove a tighter bound. Indeed, using a Chernoff bound we have

$$\begin{aligned}
\mathbb{P}(\widehat{p}_j - p(j) \geq v) &\leq \exp\left(-\frac{n\alpha^2}{16}v^2\right) \mathbb{E}\left[e^{\frac{n\alpha^2 v}{16}\{\widehat{p}_j - p(j)\}}\right] \\
&\leq \exp\left(-\frac{n\alpha^2}{16}v^2 + \frac{1}{8n}\left(\frac{n\alpha^2 v}{16}\right)^2 - n \log\left(1 - \frac{4}{n^2\alpha^2}\left(\frac{n\alpha^2 v}{16}\right)^2\right)\right) \\
&\leq \exp\left(-\frac{n\alpha^2}{32}v^2\right).
\end{aligned}$$

With a similar bound for the lower tail, we thus establish that

$$|\widehat{p}(j) - p(j)| \leq v, \quad \text{with probability larger than } 1 - 2 \exp\left(-\frac{n\alpha^2 v^2}{32}\right). \tag{8}$$

Thus, when  $p(j) - p_0(j) \geq 2\tau$ , we have

$$\begin{aligned}
\text{Var}([\widehat{p}_j - p_0(j)]_{-\tau}^\tau) &\leq \mathbb{E}\{(\tau - [\widehat{p}_j - p_0(j)]_{-\tau}^\tau)^2\} \leq 4\tau^2 \mathbb{P}(\widehat{p}_j - p_0(j) \leq \tau) \\
&\leq 8\tau^2 \exp\left(-\frac{n\alpha^2}{32}\{p(j) - p_0(j) - \tau\}^2\right) \leq \frac{8}{n\alpha^2} \exp\left(-\frac{n\alpha^2\{p(j) - p_0(j)\}^2}{128}\right), \tag{9}
\end{aligned}$$

and we can similarly prove the same bound when  $p(j) - p_0(j) \leq -2\tau$ . Using (7) and (9), we can see that, for any value of  $p(j) - p_0(j)$ , we have

$$\text{Var}([\widehat{p}_j - p_0(j)]_{-\tau}^\tau) \leq \frac{8}{n\alpha^2} \exp\left(-\frac{n\alpha^2\{p(j) - p_0(j)\}^2}{128}\right). \tag{10}$$

For  $j \in [d]$  we will write  $P_j := [\widehat{p}_j - p_0(j)]_{-\tau}^\tau$  and, for  $i \in [n+1]$  and  $j' \in [d]$  we will write  $\mathbb{E}_i(\cdot) := \mathbb{E}(\cdot | X_1, \dots, X_{i-1})$  and  $\mathbb{E}_i^j(\cdot) := \mathbb{E}(\cdot \times \mathbb{1}_{\{X_i=j\}} | X_1, \dots, X_{i-1})/p(j)$  for conditional expectations. We will use the fact that  $\mathbb{E}_i^{j_1}(P_j) = \mathbb{E}_i^{j_2}(P_j)$  almost surely for any  $j_1, j_2 \neq j$  and  $i \in [n+1]$ . For

$j_1, j_2 \in [d]$  such that  $j_1 \neq j_2$ , we now consider

$$\begin{aligned}
\text{Cov}(P_{j_1}, P_{j_2}) &= \text{Cov}\left(\mathbb{E}_{n+1}(P_{j_1}), \mathbb{E}_{n+1}(P_{j_2})\right) \\
&= \sum_{i=1}^n \mathbb{E}\left\{\mathbb{E}_{i+1}(P_{j_1})\mathbb{E}_{i+1}(P_{j_2}) - \mathbb{E}_i(P_{j_1})\mathbb{E}_i(P_{j_2})\right\} \\
&= \sum_{i=1}^n \mathbb{E}\left[p(j_1)\mathbb{E}_i^{j_1}(P_{j_1})\mathbb{E}_i^{j_1}(P_{j_2}) + p(j_2)\mathbb{E}_i^{j_2}(P_{j_1})\mathbb{E}_i^{j_2}(P_{j_2}) + \{1 - p(j_1) - p(j_2)\}\mathbb{E}_i^{j_2}(P_{j_1})\mathbb{E}_i^{j_1}(P_{j_2})\right. \\
&\quad \left. - \{p(j_1)\mathbb{E}_i^{j_1}(P_{j_1}) + (1 - p(j_1))\mathbb{E}_i^{j_2}(P_{j_1})\}\{p(j_2)\mathbb{E}_i^{j_2}(P_{j_2}) + (1 - p(j_2))\mathbb{E}_i^{j_1}(P_{j_2})\}\right] \\
&= - \sum_{i=1}^n p(j_1)p(j_2)\mathbb{E}\left[\{\mathbb{E}_i^{j_1}(P_{j_1}) - \mathbb{E}_i^{j_2}(P_{j_1})\}\{\mathbb{E}_i^{j_2}(P_{j_2}) - \mathbb{E}_i^{j_1}(P_{j_2})\}\right] \\
&= -np(j_1)p(j_2)\mathbb{E}\left[\{[n^{-1} + \widehat{p}_{j_1} - p_0(j_1)]_{-\tau}^\tau - [\widehat{p}_{j_1} - p_0(j_1)]_{-\tau}^\tau\}\right. \\
&\quad \left.\times \{[\widehat{p}_{j_2} - p_0(j_2)]_{-\tau}^\tau - [\widehat{p}_{j_2} - p_0(j_2) - n^{-1}]_{-\tau}^\tau \mid X_1 = j_2\}\right]. \quad (11)
\end{aligned}$$

We can therefore always say that, when  $j_1 \neq j_2$ , we have

$$|\text{Cov}([\widehat{p}_{j_1} - p_0(j_1)]_{-\tau}^\tau, [\widehat{p}_{j_2} - p_0(j_2)]_{-\tau}^\tau)| \leq p(j_1)p(j_2)/n. \quad (12)$$

However, as before, tighter bound are available when  $\max(|p(j_1) - p_0(j_1)|, |p(j_2) - p_0(j_2)|)$  is large. Indeed, if  $j \in [d]$  is such that  $|p(j) - p_0(j)| \geq 2(\tau + 1/n)$ , then, by (8) we have

$$\begin{aligned}
&\mathbb{E}\left[\{[\widehat{p}_j - p_0(j)]_{-\tau}^\tau - [\widehat{p}_j - p_0(j) - n^{-1}]_{-\tau}^\tau\}^2 \mid X_1 = j\right] \\
&\leq \frac{1}{n^2}\mathbb{P}\left(\frac{1}{n}\sum_{i=2}^n \mathbb{1}_{\{X_i=j\}} + \frac{2}{n\alpha}\sum_{i=1}^n W_{ij} - p_0(j) \leq \tau\right) \\
&\leq \frac{1}{n^2}\mathbb{P}\left(\left|\frac{1}{n}\sum_{i=2}^n \{\mathbb{1}_{\{X_i=j\}} - p(j)\} + \frac{2}{n\alpha}\sum_{i=1}^n W_{ij}\right| \geq p(j) - p_0(j) - \tau - \frac{1}{n}\right) \\
&\leq \frac{2}{n^2}\exp\left(-\frac{n\alpha^2}{32}\{p(j) - p_0(j) - \tau - 1/n\}^2\right) \leq \frac{2}{n^2}\exp\left(-\frac{n\alpha^2\{p(j) - p_0(j)\}^2}{128}\right). \quad (13)
\end{aligned}$$

It now follows from Cauchy–Schwarz, (11), (12) and (13) that, whenever  $j_1 \neq j_2$ , we have

$$\begin{aligned}
&|\text{Cov}([\widehat{p}_{j_1} - p_0(j_1)]_{-\tau}^\tau, [\widehat{p}_{j_2} - p_0(j_2)]_{-\tau}^\tau)| \\
&\leq \frac{2}{n}p(j_1)p(j_2)\exp\left(-\frac{n\alpha^2}{256}[\{p(j_1) - p_0(j_1)\}^2 + \{p(j_2) - p_0(j_2)\}^2]\right). \quad (14)
\end{aligned}$$

It now follows from (10), (14) and the fact that  $\sup_{x \geq 0} \frac{xe^{-x^2/128}}{x \wedge 1} = 8e^{-1/2}$ , that

$$\begin{aligned}
\text{Var}(D_B) &= \mathbb{E}\left\{\text{Var}(D_B \mid Z_1, \dots, Z_n)\right\} + \text{Var}\left(\mathbb{E}\{D_B \mid Z_1, \dots, Z_n\}\right) \\
&= \frac{c_\alpha^2 \tau^2}{n} + \text{Var}\left(\sum_{j=1}^d \{p(j) - p_0(j)\}[\widehat{p}_j - p_0(j)]_{-\tau}^\tau\right) \\
&\leq \frac{c_\alpha^2 \tau^2}{n} + \frac{8}{n\alpha^2}\sum_{j=1}^d \{p(j) - p_0(j)\}^2 \exp\left(-\frac{n\alpha^2\{p(j) - p_0(j)\}^2}{128}\right) \\
&\quad + \frac{2}{n}\left\{\sum_{j=1}^d |p(j) - p_0(j)|p(j) \exp\left(-\frac{n\alpha^2\{p(j) - p_0(j)\}^2}{256}\right)\right\}^2 \\
&\leq \frac{c_\alpha^2 \tau^2}{n} + \frac{10}{n\alpha^2}\sum_{j=1}^d \{p(j) - p_0(j)\}^2 \exp\left(-\frac{n\alpha^2\{p(j) - p_0(j)\}^2}{128}\right) \\
&\leq \frac{c_\alpha^2 \tau^2}{n} + \frac{80}{n\alpha^2 e^{1/2}} D_\tau(p) \leq \frac{(e+1)^2}{(e-1)^2 (n\alpha^2)^2} + \frac{80 D_\tau(p)}{e^{1/2} n\alpha^2}. \quad (15)
\end{aligned}$$

Under  $H_0$ , we can now see that

$$\mathbb{P}(D_B \geq C_3) = \mathbb{P}\left(D_B \geq \frac{e+1}{e-1} \frac{(4/\gamma)^{1/2}}{n\alpha^2}\right) \leq \frac{\gamma}{4}.$$

As we have already shown in the proof of Theorem 1, we also have that  $\mathbb{P}(T_B \geq C_{2,B}) \leq \gamma/4$  under  $H_0$ , so that the Type I error of our combined test  $\psi_B$  is bounded above by  $\gamma/2$ . Now, suppose that  $p$  is such that

$$D_\tau(p) \geq \max\left\{(4/\gamma)^{1/2} \frac{4(e+1)}{e-1}, \frac{10240}{e^{1/2}\gamma}, 12C\right\} \frac{1}{n\alpha^2},$$

where  $C$  is the universal constant in (6). For such  $p$ , it follows from (6) and (15) that

$$\mathbb{P}(D_B < C_3) \leq \frac{\text{Var} D_B}{\{\frac{1}{2}D_\tau(p) - C_3\}^2} \leq \frac{\gamma}{2}.$$

Now, under  $H_1(\delta, \mathbb{L}_2)$ , we have

$$\begin{aligned} D_\tau(p) &= \sum_{j=1}^d \{p(j) - p_0(j)\}^2 \min(1, \tau/|p(j) - p_0(j)|) \\ &\geq \min(\|p - p_0\|_2^2, \tau\|p - p_0\|_2) \geq \min(\delta^2, \tau\delta) \end{aligned}$$

This proves that

$$\mathcal{E}_{n,\alpha}(p_0, \mathbb{L}_2) \leq \max\left\{(4/\gamma)^{1/2} \frac{4(e+1)}{e-1}, \frac{10240}{e^{1/2}\gamma}, 12C\right\} \frac{1}{(n\alpha^2)^{1/2}}.$$

We now prove the  $\mathbb{L}_1$  result. Let  $\emptyset \neq B \subseteq [d]$  be given, and suppose that

$$\delta \geq 8 \max\left[\left(\frac{|B|}{n\alpha^2}\right)^{1/2} \max\left\{(4/\gamma)^{1/2} \frac{4(e+1)}{e-1}, \frac{10240}{e^{1/2}\gamma}, 12C\right\}, p_0(B^c)\right].$$

Then, under  $H_1(\delta, \mathbb{L}_1)$ , at least one of

$$\sum_{j \in B} |p(j) - p_0(j)| \geq \left(\frac{|B|}{n\alpha^2}\right)^{1/2} \max\left\{(4/\gamma)^{1/2} \frac{4(e+1)}{e-1}, \frac{10240}{e^{1/2}\gamma}, 12C\right\}$$

or

$$\sum_{j \in B^c} |p(j) - p_0(j)| \geq 2p_0(B^c) + \frac{6 + 3\sqrt{2}}{(n\alpha^2\gamma)^{1/2}}$$

holds. If the second of these holds, then, as in the proof of Theorem 1, we have  $\mathbb{P}(T_B < C_{2,B}) \leq \gamma/2$ . On the other hand, if the first holds, then we have

$$\begin{aligned} \|p - p_0\|_2^2 &\geq \sum_{j \in B} \{p(j) - p_0(j)\}^2 \geq \frac{1}{|B|} \left(\sum_{j \in B} |p(j) - p_0(j)|\right)^2 \\ &\geq \max\left\{(4/\gamma)^{1/2} \frac{4(e+1)}{e-1}, \frac{10240}{e^{1/2}\gamma}, 12C\right\}^2 \frac{1}{n\alpha^2}, \end{aligned}$$

and our interactive test rejects  $H_0$  with probability at least  $\gamma/2$ . Thus,

$$\mathcal{E}_{n,\alpha}^I(p_0, \mathbb{L}_1) \leq 8 \max\left[\left(\frac{|B|}{n\alpha^2}\right)^{1/2} \max\left\{(4/\gamma)^{1/2} \frac{4(e+1)}{e-1}, \frac{10240}{e^{1/2}\gamma}, 12C\right\}, p_0(B^c)\right].$$

□

*Proof of Proposition 4.* The minimax risk for testing is

$$\begin{aligned} \mathcal{R}_{n,\alpha}(p_0, \delta) &\geq \inf_{Q \in \mathcal{Q}_\alpha} \inf_{\phi \in \Phi_Q} \sup_{p_\xi \in H_1(\delta), \xi \in \mathcal{V}} \{\mathbb{E}_{p_0}(\phi) + \mathbb{E}_p(1 - \phi)\} \\ &\geq \inf_{Q \in \mathcal{Q}_\alpha} \inf_{\phi \in \Phi_Q} \{\mathbb{E}_{p_0}(\phi) + E_\xi[\mathbb{E}_{p_\xi}(1 - \phi) \cdot I_{p_\xi \in H_1(\delta)}]\}, \end{aligned}$$

where  $E_\xi$  is the average with respect to  $\xi$  uniformly distributed over  $\mathcal{V}$ .

Denote by  $QP_0^n$  and  $QP_\xi^n$  the likelihood of the sample  $Z_1, \dots, Z_n$  when the original sample is distributed according to  $p_0$  and  $p_\xi$ , respectively. We write

$$\begin{aligned} E_\xi [\mathbb{E}_{p_\xi}(1 - \phi) \cdot I_{p_\xi \in H_1(\delta)}] &= E_\xi \left[ \mathbb{E}_{p_0} \frac{QP_\xi^n}{QP_0^n} (1 - I_{p_\xi \notin H_1(\delta)}) \cdot (1 - \phi) \right] \\ &= \mathbb{E}_{p_0} \left[ E_\xi \frac{QP_\xi^n}{QP_0^n} (1 - I_{p_\xi \notin H_1(\delta)}) \cdot (1 - \phi) \right] \geq \mathbb{E}_{p_0} \left[ E_\xi \frac{QP_\xi^n}{QP_0^n} (1 - \phi) \right] - \gamma_1. \end{aligned}$$

Back to the minimax risk

$$\begin{aligned} \mathcal{R}_{n,\alpha}(p_0, \delta) &\geq \inf_{Q \in \mathcal{Q}_\alpha} \inf_{\phi \in \Phi_Q} \mathbb{E}_{p_0}(\phi) + \mathbb{E}_{p_0} \left[ E_\xi \frac{QP_\xi^n}{QP_0^n} (1 - \phi) \right] - \gamma_1 \\ &\geq \inf_{Q \in \mathcal{Q}_\alpha} (1 - \eta) \mathbb{P}_{p_0} \left( E_\xi \frac{QP_\xi^n}{QP_0^n} \geq 1 - \eta \right) - \gamma_1 \\ &\geq \inf_{Q \in \mathcal{Q}_\alpha} (1 - \eta) \left( 1 - \frac{1}{\eta} TV(QP_0^n, E_\xi QP_\xi^n) \right) - \gamma_1, \end{aligned}$$

for arbitrary  $\eta$  in  $(0,1)$ .  $\square$

*Proof of Theorem 5.* For general sequentially interactive mechanisms, we use the convexity of the Kullback–Leibler discrepancy and the fact that the Kullback–Leibler discrepancy is bounded above by the  $\chi^2$  discrepancy to get

$$\begin{aligned} KL(QP_0^n, E_\xi QP_\xi^n) &\leq E_\xi \int m^0(z) \log \frac{m^\xi(z)}{m^0(z)} dz \\ &= \sum_{i=1}^n E_\xi \mathbb{E}_{p_0} \left[ \int \log \frac{m_i^\xi(z_i | Z_1, \dots, Z_{i-1})}{m_i^0(z_i | Z_1, \dots, Z_{i-1})} m_i^0(z_i | Z_1, \dots, Z_{i-1}) dz_i \right] \\ &\leq \sum_{i=1}^n E_\xi \mathbb{E}_{p_0} \left[ \int \frac{(m_i^\xi - m_i^0)^2(z_i | Z_1, \dots, Z_{i-1})}{m_i^0(z_i | Z_1, \dots, Z_{i-1})} dz_i \right] \\ &= \sum_{i=1}^n E_\xi \mathbb{E}_{p_0} \left[ (p_\xi - p_0)^\top \int \frac{q_i(z_i | \cdot, Z_1, \dots, Z_{i-1}) q_i(z_i | \cdot, Z_1, \dots, Z_{i-1})^\top}{m_i^0(z_i | Z_1, \dots, Z_{i-1})} dz_i (p_\xi - p_0) \right] \\ &= E_\xi [(p_\xi - p_0)^\top \Omega (p_\xi - p_0)]. \end{aligned}$$

In the particular case of noninteractive mechanisms, we have

$$\begin{aligned} \chi^2(QP_0^n, E_\xi QP_\xi^n) &= \mathbb{E}_{p_0} \left[ \left( E_\xi \frac{m_1^\xi(Z_1) \cdot \dots \cdot m_n^\xi(Z_n)}{m_1^0(Z_1) \cdot \dots \cdot m_n^0(Z_n)} \right)^2 \right] - 1 \\ &= \mathbb{E}_{p_0} \left[ E_{\xi, \xi'} \left( \frac{m_1^\xi(Z_1) \cdot \dots \cdot m_n^\xi(Z_n)}{m_1^0(Z_1) \cdot \dots \cdot m_n^0(Z_n)} \frac{m_1^{\xi'}(Z_1) \cdot \dots \cdot m_n^{\xi'}(Z_n)}{m_1^0(Z_1) \cdot \dots \cdot m_n^0(Z_n)} \right) \right] - 1 \\ &= E_{\xi, \xi'} \prod_{i=1}^n \mathbb{E}_{p_0} \left[ \left( 1 + \frac{m_i^\xi(Z_i) - m_i^0(Z_i)}{m_i^0(Z_i)} \right) \left( 1 + \frac{m_i^{\xi'}(Z_i) - m_i^0(Z_i)}{m_i^0(Z_i)} \right) \right] - 1 \\ &= E_{\xi, \xi'} \prod_{i=1}^n \left( 1 + \mathbb{E}_{p_0} \left[ \frac{m_i^\xi(Z_i) - m_i^0(Z_i)}{m_i^0(Z_i)} \frac{m_i^{\xi'}(Z_i) - m_i^0(Z_i)}{m_i^0(Z_i)} \right] \right) - 1. \end{aligned}$$

Indeed,  $\mathbb{E}_{p_0} [(m_i^\xi(Z_i) - m_i^0(Z_i))/m_i^0(Z_i)] = 0$ . Moreover,

$$\begin{aligned} \chi^2(QP_0^n, E_\xi QP_\xi^n) &\leq E_{\xi, \xi'} \exp \left( \sum_{i=1}^n \mathbb{E}_{p_0} \left( \frac{m_i^\xi(Z_i)}{m_i^0(Z_i)} - 1 \right) \left( \frac{m_i^{\xi'}(Z_i)}{m_i^0(Z_i)} - 1 \right) \right) - 1 \\ &\leq E_{\xi, \xi'} \exp \left( (p_\xi - p_0)^\top \sum_{i=1}^n \mathbb{E}_{p_0} \left[ \left( \frac{q_i^\xi(Z_i | \cdot)}{m_i^0(Z_i)} - 1 \right) \left( \frac{q_i^{\xi'}(Z_i | \cdot)}{m_i^0(Z_i)} - 1 \right) \right] (p_{\xi'} - p_0) \right) - 1 \\ &\leq E_{\xi, \xi'} [\exp ((p_\xi - p_0)^\top \Omega (p_{\xi'} - p_0))] - 1. \end{aligned}$$

□

*Proof of Theorem 6.* For  $i \in [n]$ , write  $q_i(j|\cdot)$  for the density of  $Z_i|\{X_i = j\}$ , and write

$$m_0^i(z) := \sum_{j=1}^d q_i(z|j)p_0(j).$$

For  $j_* \in [d]$  let  $B = \{2, \dots, j_* + 1\}$ , and for  $j, j' \in B$  and  $i \in [n]$  write

$$\omega_{jj'}^i = \int m_0^i(z) \left\{ \frac{q_i(z|j)}{m_0^i(z)} - 1 \right\} \left\{ \frac{q_i(z|j')}{m_0^i(z)} - 1 \right\} dz.$$

For each  $i \in [n]$ , the matrix  $\Omega_i := (\omega_{jj'}^i)_{j, j' \in B}$  is a covariance matrix so it is symmetric and non-negative definite. Writing  $\bar{\Omega} := n^{-1} \sum_{i=1}^n \Omega_i$ , then  $\bar{\Omega}$  is also symmetric and non-negative definite and hence has real eigenvalues  $0 \leq \lambda_1 \leq \dots \leq \lambda_{j_*}$  and associated eigenvectors  $v_1, \dots, v_{j_*}$ . Since  $Q$  is  $\alpha$ -LDP we have that

$$\text{trace}(\bar{\Omega}) = \frac{1}{n} \sum_{i=1}^n \text{trace}(\Omega_i) = \frac{1}{n} \sum_{i=1}^n \sum_{j \in B} \int m_0^i(z) \left\{ \frac{q_i(z|j)}{m_0^i(z)} - 1 \right\}^2 dz \leq (e^\alpha - 1)^2 j_*.$$

Now if we take  $j_0 := \max\{j \in B : \lambda_j \leq 2(e^\alpha - 1)^2\}$  we have that  $j_0 > j_*/2 - 1$ . Indeed, if we had  $j_0 \leq j_*/2 - 1$  then

$$\sum_{j > j_0}^{j_*} \lambda_j > (j_* - j_0) \cdot 2(e^\alpha - 1)^2 \geq (j_* + 2)(e^\alpha - 1)^2,$$

which is in contradiction with the fact that  $\sum_j \lambda_j \leq j_*(e^\alpha - 1)^2$ .

Given a sequence  $\xi = (\xi_1, \dots, \xi_{j_0}) \in \{-1, 1\}^{j_0}$  define  $\delta_\xi^j := \sum_{k=1}^{j_0} \xi_k v_{kj}$  for  $j \in B$ , define  $\delta_\xi^+ := \sum_{j \in B} \delta_j$  and, given  $\epsilon > 0$ , define

$$p_\xi(j) := \begin{cases} p_0(j)(1 - \epsilon \delta_\xi^+) + \epsilon \delta_\xi^j & \text{if } j \in B \\ p_0(j)(1 - \epsilon \delta_\xi^+) & \text{otherwise} \end{cases}.$$

Note that we have  $\sum_{j=1}^d p_\xi(j) = 1$ . Write  $\Xi_\epsilon \subset \{-1, 1\}^{j_0}$  for the set of all sequences  $\xi$  such that  $|\delta_\xi^+| \leq 1/(2\epsilon)$  and  $\max_{j \in B} |\delta_\xi^j| \leq p_0(j_* + 1)/(2\epsilon)$ . Then, for  $\xi \in \Xi_\epsilon$ , we have  $p_\xi \in \mathcal{P}_d$ . Given  $\xi \in \Xi_\epsilon$  write

$$\begin{aligned} m_\xi^i(z) &= \sum_{j=1}^d q_i(z|j)p_\xi(j) = (1 - \epsilon \delta_\xi^+) m_0^i(z) + \epsilon \sum_{j \in B} \delta_\xi^j q_i(z|j) \\ &= m_0^i(z) \left[ 1 + \epsilon \sum_{j \in B} \delta_\xi^j \left\{ \frac{q_i(z|j)}{m_0^i(z)} - 1 \right\} \right] = m_0^i(z) \left[ 1 + \epsilon \delta_\xi^T \left\{ \frac{q_i(z|\cdot)}{m_0^i(z)} - \mathbf{1} \right\} \right] \end{aligned}$$

where we write  $\mathbf{1} = (1, \dots, 1) \in \mathbb{R}^{j_*}$  for the constant vector,  $q_i(z|\cdot) = (q_i(z|2), \dots, q_i(z|j_* + 1))$  and  $\delta_\xi = (\delta_\xi^2, \dots, \delta_\xi^{j_*}) = \sum_{k=1}^{j_0} \xi_k v_k$ . Let  $\eta$  be a uniformly random element of  $\Xi_\epsilon$ , and define

$$Y = E_\eta \left[ \frac{m_\eta^1(Z_1) \dots m_\eta^n(Z_n)}{m_0^1(Z_1) \dots m_0^n(Z_n)} \right] - 1.$$



Let  $\eta'$  be an independent copy of  $\eta$ , and let  $\xi, \xi'$  be two independent sequences of Rademacher random variables. Then, using the facts that  $1 + x \leq e^x$  for all  $x \in \mathbb{R}$  and  $\Xi_\epsilon = -\Xi_\epsilon$ , we have

$$\begin{aligned}
\mathbb{E}_{p_0}(Y^2) &= E_{\eta, \eta'} \left[ \int \frac{m_\eta^1(z_1) m_{\eta'}^1(z_1) \dots m_\eta^{j_0}(z_{j_0}) m_{\eta'}^{j_0}(z_{j_0})}{m_0^1(z_1) \dots m_0^{j_0}(z_{j_0})} dz_1 \dots dz_{j_0} \right] - 1 \\
&= E_{\eta, \eta'} \left\{ (1 + \epsilon^2 \delta_\eta^T \Omega_1 \delta_{\eta'}) \dots (1 + \epsilon^2 \delta_\eta^T \Omega_n \delta_{\eta'}) \right\} - 1 \leq E_{\eta, \eta'} \left\{ \exp(n\epsilon^2 \delta_\eta^T \bar{\Omega} \delta_{\eta'}) \right\} - 1 \\
&= E_{\eta, \eta'} \left\{ \exp \left( n\epsilon^2 \sum_{k=1}^{j_0} \eta_k \eta'_k \lambda_k \right) - 1 \right\} = E_{\eta, \eta'} \left\{ \sum_{\ell=1}^{\infty} \frac{1}{(2\ell)!} \left( n\epsilon^2 \sum_{k=1}^{j_0} \eta_k \eta'_k \lambda_k \right)^{2\ell} \right\} \\
&\leq \frac{1}{P_\xi(\xi \in \Xi_\epsilon)^2} E_{\xi, \xi'} \left\{ \sum_{\ell=1}^{\infty} \frac{1}{(2\ell)!} \left( n\epsilon^2 \sum_{k=1}^{j_0} \xi_k \xi'_k \lambda_k \right)^{2\ell} \right\} \\
&= \frac{1}{P_\xi(\xi \in \Xi_\epsilon)^2} E_{\xi, \xi'} \left\{ \exp \left( n\epsilon^2 \sum_{k=1}^{j_0} \xi_k \xi'_k \lambda_k \right) - 1 \right\} \\
&\leq \frac{1}{P_\xi(\xi \in \Xi_\epsilon)^2} \left\{ \exp \left( \frac{n^2 \epsilon^4}{2} \sum_{k=1}^{j_0} \lambda_k^2 \right) - 1 \right\} \leq \frac{\exp(2n^2 \epsilon^4 (e^\alpha - 1)^4 j_0) - 1}{P_\xi(\xi \in \Xi_\epsilon)^2}.
\end{aligned}$$

We now study  $P_\xi(\xi \in \Xi_\epsilon)$ . Note that for each  $j \in B$  the random variable  $\delta_\xi^j$  is subgaussian with variance proxy  $\sum_{k=1}^{j_0} v_{kj}^2 \leq 1$ . We therefore have [Boucheron, Lugosi and Massart, 2013, Theorem 11.8]

$$E_\xi \left\{ \max_{j \in B} |\delta_\xi^j| \right\} \leq \{2 \log(2j_*)\}^{1/2} \quad \text{and} \quad \text{Var}_\xi \left( \max_{j \in B} |\delta_\xi^j| \right) \leq 8 \{2 \log(2j_*)\}^{1/2} + 2.$$

Hence,  $P_\xi(\max_{j \in B} |\delta_\xi^j| \geq 2 \log^{1/2}(2j_*)) \rightarrow 0$  as  $d \rightarrow \infty$ . Now  $\delta_\xi^+$  is subgaussian with variance proxy

$$\sum_{k=1}^{j_0} \left( \sum_{j \in B} v_{kj} \right)^2 = \sum_{k=1}^{j_0} (v_k^T \mathbf{1})^2 \leq \|\mathbf{1}\|^2 \leq j_*.$$

We may therefore take

$$\epsilon \asymp \min \left\{ \frac{1}{j_*^{1/4} (n\alpha^2)^{1/2}}, \frac{p_0(j_* + 1)}{\log^{1/2}(j_*)}, \frac{1}{j_*^{1/2}} \right\}.$$

Now

$$\|p_\xi - p_0\|_1 = \epsilon \sum_{j \in B} |\delta_\xi^j - p_0(j) \delta_\xi^+| + \epsilon \sum_{j \in B^c} p_0(j) |\delta_\xi^+| \geq \epsilon \sum_{j \in B} |\delta_\xi^j| - \epsilon |\delta_\xi^+|.$$

By the Khintchine inequality we have that

$$\begin{aligned}
\sum_{j \in B} E_\xi |\delta_\xi^j| &= \sum_{j \in B} E_\xi \left| \sum_{k=1}^{j_0} \xi_k v_{kj} \right| \geq \frac{1}{2^{1/2}} \sum_{j \in B} \left( \sum_{k=1}^{j_0} v_{kj}^2 \right)^{1/2} \geq \frac{1}{2^{3/2}} \sum_{j \in B} \mathbb{1}_{\{\sum_{k=1}^{j_0} v_{kj}^2 \geq 1/4\}} \\
&\geq \frac{1}{2^{3/2}} \left( \sum_{j \in B} \sum_{k=1}^{j_0} v_{kj}^2 - \frac{j_*}{4} \right) = \frac{j_0 - j_*/4}{2^{3/2}} \geq \frac{j_*}{24\sqrt{2}},
\end{aligned}$$

where the final inequality follows from the facts that  $j_0 > j_*/2 - 1$  and  $j_0 \in \mathbb{N}$ . Now

$$\text{Var}_\xi \left( \sum_{j \in B} |\delta_\xi^j| \right) = \text{Var}_\xi \left( \sum_{j \in B} \left| \sum_{k=1}^{j_0} \xi_k v_{kj} \right| \right) \leq E_\xi \left[ \left( \sum_{j \in B} \left| \sum_{k=1}^{j_0} \xi_k v_{kj} \right| \right)^2 \right].$$

Denote by  $V = \sum_{j \in B} \left| \sum_{k=1}^{j_0} \xi_k v_{kj} \right|$ . We can prove that, for  $t > 1$ ,

$$\begin{aligned}
P_\xi \left( V \geq t \sqrt{2 \log(j_*)} \right) &\leq \sum_{j \in B} P_\xi \left( \left| \sum_{k=1}^{j_0} \xi_k v_{kj} \right| \geq t \sqrt{2 \log(j_*)} \right) \\
&\leq j_* \exp(-t^2 \log(j_*)) \leq \exp(-(t^2 - 1) \log(j_*)).
\end{aligned}$$

Now,  $E_\xi[V^2] = \int_0^\infty 2vP_\xi(V \geq v)dv \leq 2j^* + 2 \int_{j^*}^\infty v \exp(-v^2/2 + j^*)dv \lesssim j^*$ .

Moreover,  $E_\xi|\delta_\xi^+| \leq j^{1/2}$ . Writing  $Z := \frac{\sum_{j \in B} |\delta_\xi^j|}{\sum_{j \in B} \mathbb{E}|\delta_\xi^j|}$  we have  $\text{Var}_\xi(Z) \leq 1152$  and hence that

$$1 = E_\xi Z \leq \frac{1}{4} + 4612P_\xi(1/4 \leq Z < 4612) + \frac{\mathbb{E}(Z^2)}{4612} \leq \frac{1}{2} + 4612P_\xi(Z \geq 1/4).$$

Thus,

$$\begin{aligned} P_\xi\left(\|p_\xi - p_0\|_1 \geq \frac{\epsilon j^*}{192\sqrt{2}}\right) &\geq P_\xi\left(\sum_{j \in B} |\delta_\xi^j| \geq \frac{j^*}{96\sqrt{2}}\right) - P_\xi\left(|\delta_\xi^+| > \frac{j^*}{192\sqrt{2}}\right) \\ &\geq \frac{1}{9224} - \frac{192\sqrt{2}}{j^{1/2}} \geq \frac{1}{10000} \end{aligned}$$

for  $j^*$  sufficiently large. Thus

$$\begin{aligned} \mathcal{E}_{n,\alpha}^{\text{NI}}(p_0, \mathbb{L}_1) &\gtrsim \epsilon j^* \gtrsim \min\left\{\frac{j^{3/4}}{(n\alpha^2)^{1/2}}, \frac{j^* p_0(j^* + 1)}{\log^{1/2}(2j^*)}, j^{1/2}\right\} \\ &= \min\left\{\frac{j^{3/4}}{(n\alpha^2)^{1/2}}, \frac{j^* p_0(j^* + 1)}{\log^{1/2}(2j^*)}\right\}, \end{aligned}$$

and the result follows.

The proof for the  $\mathbb{L}_2$  test follows the same lines. It is sufficient to bound from below  $\|p_\xi - p_0\|_2$  with high probability. We have

$$\begin{aligned} P_\xi\left(\|p_\xi - p_0\|_2^2 \geq \frac{1}{144}\epsilon^2 j^*\right) &\geq P_\xi\left(\epsilon^2 \left\{\sum_{j \in B} (\delta_\xi^j)^2 - 2\delta_\xi^+ \cdot \sum_{j \in B} \delta_\xi^j p_0(j)\right\} \geq \frac{1}{144}\epsilon^2 j^*\right) \\ &\geq P_\xi\left(\sum_{j \in B} (\delta_\xi^j)^2 \geq \frac{1}{16}j^*\right) - P_\xi\left(2\delta_\xi^+ \cdot \sum_{j \in B} \delta_\xi^j p_0(j) \geq \frac{1}{18}j^*\right), \end{aligned}$$

for  $j^*$  large enough. Moreover,  $\sum_{j \in B} E_\xi(\delta_\xi^j)^2 = \sum_{j \in B} \sum_k v_{kj}^2 = j_0$  by orthonormality of the eigenvectors  $v_j$  and

$$E_\xi\left[\left(\sum_{j \in B} (\delta_\xi^j)^2\right)^2\right] = \left(\sum_{j \in B} \sum_{k=1}^{j_0} v_{kj}^2\right)^2 = j_0^2.$$

Therefore,  $P_\xi(\sum_{j \in B} (\delta_\xi^j)^2 \geq 2j_0) \leq 1/4$ . Denote by  $Z = \sum_{j \in B} (\delta_\xi^j)^2$  We get

$$1 = E_\xi(Z/\mathbb{E}Z) \leq \frac{1}{4} + 2P_\xi(Z \geq \mathbb{E}Z/4) + P_\xi(Z \geq 2\mathbb{E}Z) \leq \frac{1}{2} + 2 \cdot P_\xi(Z \geq j_0/4)$$

meaning that  $P_\xi(Z \geq j^*/16) \geq P_\xi(Z \geq j_0/4) \geq 1/4$  (as  $j_0 \geq j^*/2 - 1 \geq j^*/4$  for  $j^*$  large enough). Also

$$\begin{aligned} P_\xi\left(2\delta_\xi^+ \cdot \sum_{j \in B} \delta_\xi^j p_0(j) \geq \frac{1}{18}j^*\right) &\leq \frac{36}{j^*} E_\xi\left[|\delta_\xi^+ \cdot \sum_{j \in B} \delta_\xi^j p_0(j)|\right] \\ &\leq \frac{36}{j^*} \left(E_\xi(\delta_\xi^+)^2 \cdot E_\xi\left(\sum_{j \in B} \delta_\xi^j p_0(j)\right)^2\right)^{1/2} \\ &\leq \frac{36}{j^*} j^{1/2} \left(\sum_k \sum_j v_{kj}^2 p_0(j)\right)^{1/2} \leq \frac{36}{j^{1/2}}, \end{aligned}$$

which is less or equal to 1/5 for  $j_*$  large enough. Thus

$$\mathcal{E}_{n,\alpha}^{\text{NI}}(p_0, \mathbb{L}_2) \gtrsim \epsilon \sqrt{j_*} \gtrsim \min \left\{ \frac{j_*^{1/4}}{(n\alpha^2)^{1/2}}, \frac{j_*^{1/2} p_0(j_* + 1)}{\log^{1/2}(2j_*)}, 1 \right\}.$$

□

*Proof of Theorem 8.* Let us first prove the bounds for the  $\mathbb{L}_2$  norm. When  $\epsilon \in [0, 1 - 1/d]$  we can define the probability vector

$$p = (1 - \epsilon)p_0 + (0, \dots, 0, \epsilon),$$

which satisfies  $\|p - p_0\|_1 = \epsilon\{1 - p_0(d)\} \leq \epsilon$  and

$$\|p - p_0\|_2 = \epsilon \left[ \{1 - p_0(d)\}^2 + \sum_{j=1}^{d-1} p_0(j)^2 \right]^{1/2} \geq \epsilon(1 - 1/d).$$

Thus, using Theorem 1 of Duchi et al. [2018] and taking  $\epsilon \leq \frac{1}{\sqrt{8n\alpha^2}}$ , we have that

$$\|M_1 - M_0\|_{\text{TV}} \leq \frac{1}{\sqrt{2}}$$

for any sequentially interactive privacy mechanism that takes  $p_0$  to  $M_0$  and  $p$  to  $M_1$ . We can therefore establish a lower bound of the order of  $(n\alpha^2)^{-1/2}$  for the  $\mathbb{L}_2$  testing problem.

**Proof of the lower bounds for the  $\mathbb{L}_1$ -risk, interactive mechanisms** Fix  $j_* \in [d]$  and write  $B = \{1, \dots, j_*\}$ . Let  $Q$  be a sequentially interactive,  $\alpha$ -LDP privacy mechanism, and for each  $i \in [n]$ ,  $j \in [d]$  and  $z_1, \dots, z_{i-1}, z$ , write  $q(z|j, z_1, \dots, z_{i-1})$  for the conditional density of  $Z_i$  given  $X_i = j, Z_1 = z_1, \dots, Z_{i-1} = z_{i-1}$ . For each  $i \in [n]$  and  $z_1, \dots, z_{i-1}$  define the  $j_* \times j_*$  matrix  $\Omega_i(z_1, \dots, z_{i-1})$  by

$$\begin{aligned} & \Omega_i(z_1, \dots, z_{i-1})_{j_1 j_2} \\ & := \int \{p_0^T q_i(z|\cdot, z_1, \dots, z_{i-1})\} \left( \frac{q_i(z|j_1, z_1, \dots, z_{i-1})}{p_0^T q_i(z|\cdot, z_1, \dots, z_{i-1})} - 1 \right) \left( \frac{q_i(z|j_2, z_1, \dots, z_{i-1})}{p_0^T q_i(z|\cdot, z_1, \dots, z_{i-1})} - 1 \right)^T dz. \end{aligned}$$

Consider the  $j_* \times j_*$  non-negative definite matrix

$$\Omega := \mathbb{E}_{p_0} \left[ \sum_{i=1}^n \Omega_i(Z_1, \dots, Z_{i-1}) \right],$$

and write  $\lambda_1 \geq \lambda_2 \geq \dots \geq \lambda_{j_*} \geq 0$  for its eigenvalues and  $v_1, \dots, v_{j_*}$  for its associated eigenvectors, with  $v_d = p_0$  and  $\lambda_d = 0$  if  $j_* = d$ . Given a sequence  $\xi = (\xi_1, \dots, \xi_{j_* \wedge (d-1)}) \in \{-1, 1\}^{j_* \wedge (d-1)}$  define  $\delta_\xi^j := \sum_{k=1}^{j_* \wedge (d-1)} \xi_k v_{kj}$  for  $j \in B$  and define  $\delta_\xi^+ := \sum_{j \in B} \delta_\xi^j$ . Further, given  $\epsilon > 0$ , set

$$p_\xi(j) := \begin{cases} (1 - \epsilon \delta_\xi^+) p_0(j) + \epsilon \delta_\xi^j & \text{if } j \in B \\ (1 - \epsilon \delta_\xi^+) p_0(j) & \text{otherwise} \end{cases}.$$

This sums to zero, and when  $\epsilon \lesssim p_0(j_*)/\sqrt{\log(2j_*)}$  and  $\xi$  is an i.i.d. Rademacher vector, then  $p_\xi$  is also non-negative with high probability. Moreover, for each  $i \in [n]$  and  $z_1, \dots, z_i$ , we have

$$\left| \frac{(p_\xi - p_0)^T q_i(z_i|\cdot, z_1, \dots, z_{i-1})}{p_0^T q_i(z_i|\cdot, z_1, \dots, z_{i-1})} \right| \leq e^{2\alpha} \|p_\xi - p_0\|_1 \leq 2e^{2\alpha} \epsilon \sum_{j \in B} \left| \sum_{k=1}^{j_* \wedge (d-1)} \xi_k v_{kj} \right|,$$

and this is  $\lesssim \epsilon j_* \rightarrow 0$  with high probability. Given  $z_1, \dots, z_n$  and  $\xi$  write

$$m_\xi(z_1, \dots, z_n) = \prod_{i=1}^n p_\xi^T q_i(z_i|\cdot, z_1, \dots, z_{i-1})$$

for the marginal density of  $Z_1, \dots, Z_n$  when  $X_1, \dots, X_n$  have distribution  $p_\xi$ , and similarly define  $m_0$  for the density of  $Z_1, \dots, Z_n$  when  $X_1, \dots, X_n$  have distribution  $p_0$ . Writing  $M_\xi$  for the distribution associated with  $m_\xi$  and  $\bar{M}$  for the mixture distribution  $E_\xi(M_\xi)$ , we have that

$$\begin{aligned}
\text{KL}(M_0 \|\bar{M}) &\leq E_\xi[\text{KL}(M_0 \|\bar{M}_\xi)] = E_\xi \left[ \int m_0(z) \log \frac{m_0(z)}{m_\xi(z)} dz \right] \\
&= - \sum_{i=1}^n E_\xi \left[ \int \left( \prod_{i'=1}^i p_0^T q_{i'}(z_{i'} | \cdot, z_1, \dots, z_{i-1}) \right) \log \left( 1 + \frac{(p_\xi - p_0)^T q_i(z_i | \cdot, z_1, \dots, z_{i-1})}{p_0^T q_i(z_i | \cdot, z_1, \dots, z_{i-1})} \right) dz_1 \dots dz_i \right] \\
&\leq \sum_{i=1}^n E_\xi \left[ \int \left( \prod_{i'=1}^i p_0^T q_{i'}(z_{i'} | \cdot, z_1, \dots, z_{i-1}) \right) \left( \frac{(p_\xi - p_0)^T q_i(z_i | \cdot, z_1, \dots, z_{i-1})}{p_0^T q_i(z_i | \cdot, z_1, \dots, z_{i-1})} \right)^2 dz_1 \dots dz_i \right] \\
&= \epsilon^2 \sum_{i=1}^n E_\xi \left[ \sum_{j_1, j_2 \in B} \delta_\xi^{j_1} \mathbb{E}_{p_0} \left\{ \Omega_i(Z_1, \dots, Z_{i-1})_{j_1 j_2} \right\} \delta_\xi^{j_2} \right] = \epsilon^2 \sum_{k_1, k_2=1}^{j_* \wedge (d-1)} E_\xi \left[ \xi_{k_1} \xi_{k_2} v_{k_1}^T \Omega v_{k_2} \right] \\
&= \epsilon^2 \sum_{k=1}^{j_* \wedge (d-1)} \lambda_k = \epsilon^2 \text{tr}(\Omega) \lesssim \epsilon^2 j_* n \alpha^2.
\end{aligned}$$

Now, as in our earlier, non-interactive, lower bound, we have

$$\|p_\xi - p_0\|_1 = \epsilon \sum_{j \in B} \left| \sum_{k=1}^{j_* \wedge (d-1)} \xi_k v_{kj} \right| \gtrsim_p \epsilon j_*.$$

We can then choose  $\epsilon \asymp \min\{(j_* n \alpha^2)^{-1/2}, p_0(j_*) / \log^{1/2}(2j_*)\}$  to prove a lower bound of

$$\epsilon j_* \asymp \min \left\{ \left( \frac{j_*}{n \alpha^2} \right)^{1/2}, \frac{p_0(j_*)}{\log^{1/2}(2j_*)} \right\}.$$

□

## A.2 Examples

**Polynomially decreasing distributions.** Suppose that  $p_0(j) \propto j^{-1-\beta}$  for some  $\beta > 0$ . Writing  $C = 2(1 - 2^{-\beta})^{-1/(\beta+3/4)}$ , when  $n \alpha^2 \leq (d/C)^{2\beta+3/2}$ , consider  $j = \lceil C(n \alpha^2)^{1/(2\beta+3/2)} \rceil$ . Then, when also  $n \alpha^2 \geq 1$ , we have that

$$\begin{aligned}
\sum_{\ell=j+1}^d p_0(\ell) &= \frac{\sum_{\ell=j+1}^d \ell^{-1-\beta}}{\sum_{\ell=1}^d \ell^{-1-\beta}} \leq \frac{\int_j^\infty x^{-1-\beta} dx}{\int_1^{d+1} x^{-1-\beta} dx} \leq \frac{j^{-\beta}}{1 - 2^{-\beta}} = \frac{j^{3/4}}{(n \alpha^2)^{1/2}} \frac{j^{-\beta-3/4} (n \alpha^2)^{1/2}}{1 - 2^{-\beta}} \\
&\leq \frac{j^{3/4}}{(n \alpha^2)^{1/2}} \frac{2^{\beta+3/4}}{C^{\beta+3/4} (1 - 2^{-\beta})} = \frac{j^{3/4}}{(n \alpha^2)^{1/2}}.
\end{aligned}$$

Thus, when  $1 \leq n \alpha^2 \leq (d/C)^{2\beta+3/2}$  we have that  $j_* \leq \lceil C(n \alpha^2)^{1/(2\beta+3/2)} \rceil$ . On the other hand, if  $n \alpha^2 > (d/C)^{2\beta+3/2}$  then we will just say that  $j_* \leq d$ . It follows that

$$\mathcal{E}_{n, \alpha}^{\text{NI}}(p_0, \mathbb{L}_1) \lesssim \frac{j_*^{3/4}}{(n \alpha^2)^{1/2}} \lesssim \min \left\{ (n \alpha^2)^{-\frac{2\beta}{4\beta+3}}, \frac{d^{3/4}}{(n \alpha^2)^{1/2}} \right\}.$$

More generally, suppose that  $p_0(j) \propto j^{-1-\beta} L(j)$  for some slowly-varying function  $L : [1, \infty) \rightarrow (0, \infty)$ . We recall that  $L$  is said to be slowly-varying if and only if  $\lim_{x \rightarrow \infty} L(tx)/L(x) = 1$  for all  $t > 0$ , and that Karamata's theorem says that

$$\lim_{x \rightarrow \infty} \frac{(\gamma - 1) \int_x^\infty t^{-\gamma} L(t) dt}{x^{-\gamma+1} L(x)} = 1$$

for any  $\gamma > 1$ . Writing  $c_d := \sum_{\ell=1}^d \ell^{-1-\beta} L(\ell)$ , whenever  $j \rightarrow \infty$  with  $j \ll d$  we have that

$$\begin{aligned}
\sum_{\ell=j+1}^d p_0(\ell) &= c_d^{-1} \sum_{\ell=j+1}^\infty \ell^{-1-\beta} L(\ell) - c_d^{-1} \sum_{\ell=d+1}^\infty \ell^{-1-\beta} L(\ell) \sim c_d^{-1} \sum_{\ell=j+1}^\infty \ell^{-1-\beta} L(\ell) \\
&\sim \frac{j^{-\beta} L(j)}{c_d \beta} = \frac{j p_0(j)}{\beta}.
\end{aligned}$$

Letting  $x_{n\alpha^2} := \inf\{x \geq 1 : L(x) < \frac{x^{3/4+\beta}}{(n\alpha^2)^{1/2}}\}$ , we can see that

$$\mathcal{E}_{n,\alpha}^{\text{NI}}(p_0, \mathbb{L}_1) \lesssim \frac{\min(x_{n\alpha^2}, d)^{3/4}}{(n\alpha^2)^{1/2}}.$$

Let us discuss the lower bounds. Writing  $c = \frac{\beta^2(2\beta+3/2)}{2(1-2^{-\beta})^2}$  and  $j = \lfloor \{c n\alpha^2 / \log(n\alpha^2)\}^{1/(2\beta+3/2)} \rfloor$ , when  $\log(n\alpha^2) \geq \log c + (2\beta + 3/2) \log 2$  and  $\frac{c n\alpha^2}{\log(n\alpha^2)} \leq d^{2\beta+3/2}$ , we have that

$$\begin{aligned} \frac{j p_0(j)}{\log^{1/2}(2j)} &= \frac{j^{-\beta}}{\log^{1/2}(2j) \sum_{\ell=1}^d \ell^{-1-\beta}} \geq \frac{\beta j^{-\beta}}{\log^{1/2}(2j)(1-2^{-\beta})} = \frac{j^{3/4}}{(n\alpha^2)^{1/2}} \frac{\beta}{1-2^{-\beta}} \frac{(n\alpha^2)^{1/2}}{\log^{1/2}(2j) j^{\beta+3/4}} \\ &\geq \frac{j^{3/4}}{(n\alpha^2)^{1/2}} \frac{\beta(2\beta+3/2)^{1/2}}{c^{1/2}(1-2^{-\beta})} \left\{ 1 + \frac{\log c + (2\beta+3/2) \log 2}{\log(n\alpha^2)} \right\}^{-1/2} \geq \frac{j^{3/4}}{(n\alpha^2)^{1/2}}. \end{aligned}$$

Hence, we have  $\ell_* \geq j$ . On the other hand, when  $\frac{c n\alpha^2}{\log(n\alpha^2)} > d^{2\beta+3/2}$  and  $\log(n\alpha^2) > c^{2\beta+3/2}$ , we have

$$\frac{d p_0(d)}{\log^{1/2}(2d)} \geq \frac{d^{3/4}}{(n\alpha^2)^{1/2}} \frac{\beta}{1-2^{-\beta}} \frac{(n\alpha^2)^{1/2}}{d^{3/4+\beta} \log^{1/2}(2d)} \geq \frac{d^{3/4}}{(n\alpha^2)^{1/2}},$$

and so  $\ell_* = d$ . In either case, then,

$$\begin{aligned} \mathcal{E}_{n,\alpha}^{\text{NI}}(p_0, \mathbb{L}_1) &\gtrsim \frac{\{(n\alpha^2)/\log(n\alpha^2)\}^{(3/4)/(2\beta+3/2)} \wedge d^{3/4}}{(n\alpha^2)^{1/2}} \\ &= \{n\alpha^2 \log^{3/(4\beta)}(n\alpha^2)\}^{-2\beta/(4\beta+3)} \wedge \frac{d^{3/4}}{(n\alpha^2)^{1/2}}. \end{aligned}$$

More generally, suppose that  $p_0(j) \propto j^{-1-\beta} L(j)$  and recall the definition of  $x_{n\alpha^2}$  from Example A.2. Taking  $j = \min(\lfloor x_{n\alpha^2} / \log(n\alpha^2) \rfloor, d)$  in Theorem 6, we have that

$$\mathcal{E}_{n,\alpha}^{\text{NI}}(p_0, \mathbb{L}_1) \gtrsim \frac{\min(x_{n\alpha^2} / \log(n\alpha^2), d)^{3/4}}{(n\alpha^2)^{1/2}},$$

which matches our upper bound up to a log factor.

**Exponentially decreasing distributions.** Suppose that  $p_0(j) \propto \exp(-j^\beta)$  for some  $\beta > 0$ . Writing  $C$  for a large constant, if  $(\frac{1}{4\beta} + \frac{1}{2}) \log(Cn\alpha^2) \leq d^\beta$  then consider  $j = \lceil \{\log(Cn\alpha^2)/2 - (1 - 1/(4\beta)) \log \log(Cn\alpha^2)\}^{1/\beta} \rceil$ . Then

$$\sum_{\ell=j}^d p_0(\ell) \leq \frac{\int_j^\infty \exp(-x^\beta) dx}{\int_1^{d+1} \exp(-x^\beta) dx} \lesssim j^{1-\beta} e^{-j^\beta} \lesssim \frac{\log^{3/(4\beta)}(Cn\alpha^2)}{\sqrt{Cn\alpha^2}} \lesssim \frac{j^{3/4}}{\sqrt{Cn\alpha^2}},$$

and we can therefore see that  $j_* \lesssim \log^{1/\beta}(n\alpha^2)$ . As a result,

$$\mathcal{E}_{n,\alpha}^{\text{NI}}(p_0, \mathbb{L}_1) \lesssim \min\left\{ \frac{\log^{3/(4\beta)}(n\alpha^2)}{(n\alpha^2)^{1/2}}, \frac{d^{3/4}}{(n\alpha^2)^{1/2}} \right\}.$$

Concerning the lower bounds, write  $c$  for a small constant and consider  $j = \lfloor \{\log(cn\alpha^2)/2 + \log \log(cn\alpha^2)/(4\beta) - \log \log \log(cn\alpha^2)/2\}^{1/\beta} \rfloor$ . If  $j \leq d$  then we have

$$\frac{j p_0(j)}{\log^{1/2}(2j)} \gtrsim \frac{\log^{1/\beta}(cn\alpha^2) e^{-j^\beta}}{\log^{1/2}(\log(cn\alpha^2))} \gtrsim \frac{\log^{3/(4\beta)}(cn\alpha^2)}{\sqrt{cn\alpha^2}} \gtrsim \frac{j^{3/4}}{\sqrt{cn\alpha^2}}.$$

If, on the other hand,  $j > d$ , then

$$\frac{d p_0(d)}{\log^{1/2}(2d)} \gtrsim \frac{d \exp(-d^\beta)}{\log^{1/2}(2d)} \gtrsim \frac{\log^{3/(4\beta)}(cn\alpha^2)}{\sqrt{cn\alpha^2}} \gtrsim \frac{d^{3/4}}{\sqrt{cn\alpha^2}}.$$

In either case, then, we have

$$\mathcal{E}_{n,\alpha}^{\text{NI}}(p_0, \mathbb{L}_1) \gtrsim \min\left\{ \frac{\log^{3/(4\beta)}(n\alpha^2)}{\sqrt{n\alpha^2}}, \frac{d^{3/4}}{\sqrt{n\alpha^2}} \right\},$$

and this matches our previous upper bound.

## References

- Boucheron, S., Lugosi, G. and Massart, P. (2013) *Concentration Inequalities*. Oxford University Press, Oxford.
- Duchi, J. C., Jordan, M. I. and Wainwright, M. J. (2018) Minimax optimal procedures for locally private estimation. *J. Amer. Stat. Soc.*, **113**(521), 182–201.
- Serfling, R. J. (1980) *Approximation Theorems of Mathematical Statistics*. John Wiley & Sons.
